1

2

3

4

5

6

7

**Non-contact measurement of emotional and physiological changes  
in heart rate from a webcam**

8

9

10 Christopher R. Madan<sup>1,3,†</sup>, Tyler Harrison<sup>1</sup>, & Kyle E. Mathewson<sup>1,2</sup>

11

12

13 <sup>1</sup> Department of Psychology, University of Alberta, Edmonton, AB, Canada

14 <sup>2</sup> Neuroscience and Mental Health Institute, University of Alberta, Edmonton,  
15 AB, Canada

16 <sup>3</sup> Department of Psychology, Boston College, Chestnut Hill, MA, USA

17

18

19

20

21

22

23 <sup>†</sup> Corresponding author.

24 Email address: [madanc@bc.edu](mailto:madanc@bc.edu)

25 Boston College, Department of Psychology,

26 McGuinn 300, 140 Commonwealth Ave.,

27 Chestnut Hill, MA, USA 02467

28

### Abstract

29 Heart rate, measured in beats per minute (BPM), can be used as an index of an  
30 individual's physiological state. Each time the heart beats, blood is expelled and travels  
31 through the body. This blood flow can be detected in the face using a standard webcam  
32 that is able to pick up subtle changes in color that cannot be seen by the naked eye. Due  
33 to the light absorption spectrum of blood, we are able to detect differences in the amount  
34 of light absorbed by the blood traveling just below the skin (i.e., photoplethysmography).  
35 By modulating emotional and physiological stress—i.e., viewing arousing images and  
36 sitting vs. standing, respectively—to elicit changes in heart rate, we explored the  
37 feasibility of using a webcam as a psychophysiological measurement of autonomic  
38 activity. We found a high level of agreement between established physiological  
39 measures, electrocardiogram (ECG), and blood pulse oximetry, and heart rate estimates  
40 obtained from the webcam. We thus suggest webcams can be used as a non-invasive and  
41 readily available method for measuring psychophysiological changes, easily integrated  
42 into existing stimulus presentation software and hardware setups.

43

44 **Keywords:** heart rate; webcam; autonomic activity; emotion; arousal

45

## Introduction

46 Heart rate (HR) is a readily measurable index of an individual's psychophysiological  
47 state, specifically autonomic arousal, used in addition to skin conductance response and  
48 pupil dilation (Bradley et al., 2008; Kahneman et al., 1969; Robinson et al., 1966).  
49 Indeed, the association between the heart and emotional/psychological states dates back  
50 to ancient Egypt (Damasio, 1994; Krantz & Falconer, 1997; Schacter & Singer, 1962), as  
51 well as permeating into culture throughout the ages (Loe & Edwards, 2004a, 2004b). HR  
52 is most often measured using an electrocardiogram (ECG), where changes in voltage  
53 generated by innervation of cardiac muscles producing a heartbeat are measured through  
54 electrode contacts that are affixed to an individual. However, ECG equipment can be  
55 costly, connections can deteriorate over time, and with some participant groups and  
56 situations it may be too invasive to apply electrodes. Other less invasive techniques to  
57 measure heart rate are therefore needed.

58 HR can be measured through methods alternative to ECG, such as  
59 photoplethysmography (PPG): the detection of variations in transmitted or reflected light  
60 (Ackles et al., 1985; Allen, 2007; Jennings et al., 1980; Lu et al., 2009; Schäfer &  
61 Vagedes, 2013). Briefly, changes in the light absorbed/reflected by blood can be used to  
62 measure the flow of blood. The absorption spectra of blood, and the measurement of the  
63 reflectance of skin color in relation to blood, has been studied for many decades within  
64 the field of medicine (e.g., Anderson & Parrish, 1981; Angelopoulou, 2001; Brunsting &  
65 Sheard, 1929a, 1929b; Edwards & Duntly, 1939; Horecker, 1943; Jakovels et al., 2010,  
66 2011, 2012; Kim & Kim, 2006; Sheard & Brown, 1926; Brunsting & Sheard, 1929;  
67 Tsumura et al., 1999, 2000, 2003). A common example of transmission PPG is a pulse

68 oximeter (PulseOx) measurement in hospital settings in which red light is passed through  
69 the finger, wrist, or foot and fluctuations in transmitted light are detected.

70 More recently, a number of studies performed in biomedical engineering  
71 laboratories have demonstrated the feasibility of non-contact measuring of HR with a  
72 webcam (i.e., a digital video camera that streams its images to a computer). Poh et al.  
73 (2010) demonstrated the validity of HR measurements from a webcam by comparing  
74 them with measurements obtained at the same time from (but not time synchronized  
75 with) a blood pulse oximetry sensor (also see Kwon et al., 2012; Poh et al., 2011a).  
76 Subsequent studies have used webcams to study changes in HR due to exercise (Sun et  
77 al., 2011, 2012) and the development of devices designed to aid with health monitoring  
78 (Poh et al., 2011b; Verkrusse et al., 2008). There have been additional technical  
79 advances in how HR is estimated from the webcam recording (e.g., Lewandowska et al.,  
80 2011; Pursche et al., 2012; Sun et al., 2012). While these studies have been beneficial in  
81 demonstrating the robustness of this approach to measuring HR, the webcam HR  
82 estimates were not compared against time-synchronized standard HR measures, and did  
83 not evaluate changes in HR as a psychophysiological measure, i.e., the effect of task-  
84 related changes on autonomic arousal. As prior studies have indicated lower limits to the  
85 sampling rate required to assess ECG signal (Hejfel & Roth, 2004; Pizzuti et al., 1985), it  
86 is not clear if the low sampling rate of the webcam will be suitable for measuring heart  
87 rate within the context of psychophysiology research.

88 To test if these techniques could be applied to experimental psychology situations  
89 as a method of psychophysiological monitoring, we used a standard webcam to record the  
90 light reflected from a participant's face. Acquisition of HR data from the webcam was

91 marked with respect to events in the stimulus presentation program, which are also  
92 marked in concurrently recorded ECG and PulseOx data. While averaging across the face  
93 area during recording of the webcam data, to provide anonymity, we measured task-  
94 related changes in a participant's HR. Specifically, we modulated emotional and  
95 physiological stress (i.e., viewing arousing images and sitting vs. standing, respectively)  
96 to elicit changes in HR to demonstrate the use of a webcam as a psychophysiological  
97 measurement of autonomic activity.

98       As a first test of event-related physiological changes in HR, we measured HR in a  
99 blocked sitting vs. standing task where we expected to observe large within-subject, task-  
100 related differences in HR. HR was measured concurrently from participants using the  
101 webcam along with ECG and pulse oximetry, for comparison. Briefly, when standing, the  
102 heart has to work harder to pump blood to the extremities to ensure sufficient force to  
103 overcome the effects of gravity (Caro et al., 1978; Herman, 2007; Rushmer, 1976).  
104 Empirically, the difference in HR for sitting vs. standing is approximately 8-10 BPM in  
105 young adults (Guy, 1837; MacWilliam, 1933; Schneider & Truesdell, 1922; also see  
106 Stein et al., 1966).

107       As a test of the feasibility of webcam HR in a task-related context, we next  
108 measured changes in HR time locked to emotional pictures, again concurrently with all  
109 three measures. Within the literature on emotional processing (e.g., Bradley et al., 2001a,  
110 2008; Buchanan et al., 2006; Critchley et al., 2013; Garfinkel & Critchley, 2016; Lang et  
111 al., 1993; Levenson, 2003), it is well known that viewing emotionally arousing stimuli  
112 increases autonomic arousal, across a variety of psychophysiological measures.  
113 Presentation of unpleasant (i.e., negative valence) pictures elicits a deceleration in HR,

114 referred to as fear bradycardia, and that this deceleration is primarily mediated by the  
115 autonomic/parasympathetic nervous system (Bradley et al., 2001a, 2001b; Campbell et  
116 al., 1997). Hare (1973) suggested that this HR deceleration could be due to an orienting  
117 response, rather than a defensive response, to viewing the picture (also see Graham &  
118 Clifton, 1966; Sokolov, 1963). Empirically, this deceleration is a change of  
119 approximately 1-3 beats per minute (BPM), with a time course of approximately 6  
120 seconds (Abercrombie et al., 2008; Bradley et al., 2008; Buchanan et al., 2006; Hare,  
121 1973). Here we tested if our webcam HR technique would provide sufficient sensitivity  
122 to measure the subtle changes associated with a typical psychophysiological experiment,  
123 with the ECG and pulse oximetry data also acquired for comparison.

124

125

## Method

### 126 Participants

127 A total of 24 volunteers participated in the experiment (age:  $M=21.7$ , range=18-25; 14  
128 female) and were recruited from the University of Alberta community using  
129 advertisements around campus. Sample size was determined based on pilot studies of the  
130 sitting vs. standing task. All participants gave informed, written consent and were  
131 compensated at a rate of \$10/hr for their time. The experimental procedures were  
132 approved by an internal research ethics board of the University of Alberta.

### 133 Equipment

134 Video was recorded using a Logitech HD Pro Webcam C920 (Logitech International  
135 S.A., Newark, CA). The webcam video was recorded in color at a resolution of 640×480,  
136 at a mean sampling rate of 12 Hz ( $0.083\pm 0.016$  s [ $M\pm SD$ ] between video frames). Stimuli

137 were presented on a Dell UltraSharp 24" monitor with a resolution of 1920×1200, using a  
138 Windows 7 PC running MATLAB R2012b (The MathWorks Inc., Natick, MA) with the  
139 Psychophysics Toolbox v. 3 (Brainard, 1997). Webcam data was simultaneously  
140 recorded using in-house code in the same MATLAB script as the stimulus presentation.

141 ECG signals were collected from bilateral wrists of participants using Ag/AgCl  
142 snap-type disposable hydrogel monitoring electrodes (ElectroTrace ET101, Jason Inc.,  
143 Huntington Beach, CA) in a bi-polar arrangement over the distal extent of the flexor  
144 digitorum superficialis muscle, with a ground over the distal extent of the left flexor carpi  
145 radialis. Prior to applying the electrodes, the participant's skin was cleaned using alcohol  
146 wipes. Blood pulse oximetry data was collected using a finger pulse sensor attached to  
147 the index finger of the participant's right hand and enclosed in a black light blocking  
148 sheath (Becker Meditec, Karlsruhe, Germany). Both sensors were connected to the AUX  
149 ports of a BrainVision V-Amp 16-channel amplifier (Brain Products GmbH, Gilching,  
150 Germany) using BIP2AUX converters. Physiological data was recorded at 500 Hz at 1.19  
151  $\mu\text{V}/\text{bit}$  using BrainVision Recorder software (Brain Products GmbH) with a band-pass  
152 online filter between 0.628 and 30 Hz.

153 For the ECG and pulse oximetry data, data was collected for the entire duration of  
154 each task (sit-stand, emotion). In order to mark the time of stimulus onset in the ECG and  
155 pulse oximetry data, an 8-bit TTL pulse was sent via parallel port by the stimulus  
156 presentation software coincident with the onset of important stimuli, marking their time  
157 and identity (i.e., onset/offset of the fixation and pictures). The webcam data was  
158 recorded in epochs for each block (in the sit-stand task) or trial (in the emotion task) by  
159 the stimulus presentation software yoked to the stimulus display. The task presentation

160 and the data collection through all three measures were done by the same computer,  
161 allowing for all signals to be easily synchronized.

## 162 **Stimuli**

163 The pictures selected for the emotion task comprised four categories, each with 15  
164 pictures/category. The pictures were selected from the International Affective Picture  
165 System (IAPS; Lang et al., 2008) database based on normative ratings for valence and  
166 arousal and were supplemented with pictures used in prior studies of emotional  
167 processing (Singhal et al., 2012; Wang et al., 2005, 2008). Mean IAPS valence/arousal  
168 scores (9-point scale, as described below) of the four categories were as follows: Neutral  
169 (Neut; 5.8/1.6), Low Arousal (Low; 3.6/3.3), Medium Arousal (Med; 2.3/5.8), and High  
170 Arousal (High; 2.3/6.1). A repeated-measures ANOVA showed that valence ratings for  
171 each category were significantly different from each adjacent category except for Med  
172 and High (i.e., Neut > Low > Med = High, [ $F(3,72) = 132.97, p < .001$ ]). A repeated-  
173 measures ANOVA of arousal ratings showed that each category was significantly  
174 different from each adjacent category such that, Neut < Low < Med < High [ $F(3,72) =$   
175 150.59,  $p < .001$ ]. Pair-wise comparisons were Holm-Bonferroni-corrected.

## 176 **Procedure**

177 The experiment was conducted in a room of an experimental lab with normal lighting  
178 conditions. The experiment consisted of two tasks: blocks of sitting and standing (sit-  
179 stand task), and passive viewing of emotional and neutral pictures (emotion task). Task  
180 order was pseudorandomized across participants. In both cases, participants were seated  
181 in front of a webcam, which was placed either on a tripod (sit-stand task) or on top of the  
182 computer monitor (emotion task).



183 ***Sitting vs. standing task.*** The sit-stand task contained 10 blocks, of 30 s each. In half of  
184 the blocks, participants were instructed to be seated, in the other half they were to stand.  
185 The order of the blocks was pseudorandomized such that no more than two blocks from  
186 the same condition (e.g., sitting) occurred sequentially.

187 Before each block, the tripod was adjusted to suit the participant's height. The  
188 participant was then instructed to be as still as possible during the 30 s of data collection.

189 ***Emotional and neutral picture-viewing task.*** The emotion task was comprised of three  
190 blocks, each consisting of 20 trials. On each trial, participants were first shown a  
191 scrambled picture with a fixation cross (“+”) overlaid, followed by an emotional or  
192 neutral picture, then followed by the scrambled picture again. Pictures were presented for  
193 2000 ms; scrambled stimuli were presented before and after each picture for 500 and  
194 3000 ms, respectively. The scrambled stimuli were scrambled versions of the emotional  
195 or neutral picture, converted to grayscale and kept isoluminant with the picture. The order  
196 that the pictures were presented was pseudorandomized such that no more than two  
197 stimuli from the same category (e.g., high arousal) were shown sequentially. Trials were  
198 separated by jittered inter-trial intervals, ranging from 5000 to 6500 ms.

199 Prior to each block, the webcam recording was calibrated such that the participant  
200 aligned their head with a template indicating the area-of-interest (AOI) using live video  
201 feedback. Once the AOI was sufficiently aligned with the participant's face, they were  
202 instructed to place their hands on the table in front of them and to remain as still as  
203 possible while the stimuli were presented and data was recorded.

204 **Data Analysis**

205 The processing workflow for the webcam analyses is outlined in Figure 1. Based on the  
206 calibration, a rectangular AOI positioned over the participant's face constrains the  
207 collection of the webcam data. To ensure the collected data preserved participant  
208 anonymity, color values for each frame were averaged across this AOI during data  
209 collection, rather than maintaining the raw webcam frame. As a result, we only retained  
210 three intensity values per webcam frame, corresponding to red, green, and blue (RGB)  
211 channels. Data for each block (sit-stand task) or trial (emotion task) were then saved for  
212 offline analyses.

213

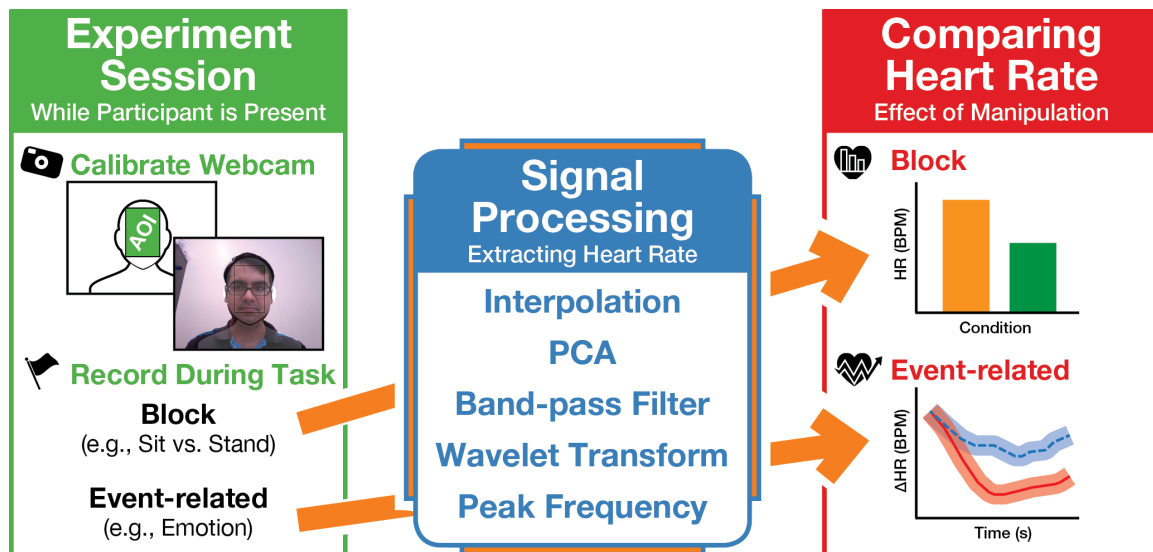

214

215 **Figure 1. Illustration of the analysis pipeline.**

216 Three pre-processing steps were used specifically on the continuous webcam data  
217 from entire blocks. First, to maximize the temporal resolution of the webcam data, we  
218 had sampled frames from the webcam as quickly as the hardware would allow (using the  
219 `videoinput` function in MATLAB), which lead to a non-uniform sampling rate. As  
220 minor fluctuations in the interval between successive frames would influence our  
221 estimated heart rate, we re-sampled the webcam data with a uniform interpolation of 12

222 Hz using the `interp` function in MATLAB. As a note to other researchers, if your  
223 hardware is able to sample from the webcam at a higher rate reliably, it would be simpler  
224 to instead have a uniform sampling rate and not necessitate re-sampling via interpolation.  
225 Second, it has been demonstrated that the green RGB color channel is the most sensitive  
226 to changes in light reflectance associated with oxygenated vs. deoxygenated blood,  
227 though the red and blue channels do still contain plethysmographic information (Lee et  
228 al., 2013; Poh et al., 2010; Sun et al., 2011, 2012; Verkruysse et al., 2008). To maximize  
229 info from all channels, we submitted the three color-channel time-series data (for the  
230 entire block) into a principal component analysis (PCA), allowing us to extract the  
231 variability in signal that was common across the three channels. We used the coefficients  
232 from the second principal component as our time-series data, as this was the component  
233 that corresponded to HR-related changes in all cases (also see Lewandowska et al., 2011;  
234 Poh et al., 2010, 2011a, 2011b; Pursche et al., 2012; Tsumura et al., 2000). Third, an  
235 additional offline Butterworth band-pass filter was applied to the data (high=0.8 Hz,  
236 low=3.0 Hz; see Gribok et al., 2011). This provided a 12-Hz signal from the webcam  
237 continuous throughout each block, along with the 500 Hz signals from the ECG and  
238 PulseOx.

239 Finally, for each each measure (webcam, ECG, PulseOx), the continuous data at  
240 submitted to a continuous wavelet (Morlet) transform implemented in the BOSC library  
241 (“Better OSCillation detection”; Hughes et al., 2012; Whitten et al., 2011). The transform  
242 was used to obtain the power spectra for the frequencies corresponding to a range of  
243 plausible heart rates, 50-140 BPM, in 1 BPM increments, and a wavelet number of 6. At

244 each time point of the resulting spectrogram, heart rate was calculated as the frequency  
245 with the highest power.

246 **Blocked design.** For the sitting vs. standing task, heart rate was estimated as a single  
247 value for each trial. Heart rate for each trial, for each measure, was estimated as the  
248 median heart rate for the 30-s block.

249 **Event-related design.** For the emotional and neutral picture-viewing task, heart rate was  
250 measured as a time-varying change, in relation to the onset of the image. To compute the  
251 event-related variations in HR, changes in HR were estimated using a sliding time-  
252 window. For each trial, epochs spanning from 5 s before to 5 s after the onset of the  
253 picture, were segmented from the continuous data.

254 Preliminary analyses indicated that the webcam data was confounded by stimulus  
255 luminance, where the luminance of the presented picture would interact with  
256 photoplethysmography signal intended to be recorded. This occurred despite pictures  
257 being preceded by an isoluminant scrambled picture; this likely occurred because trial-  
258 wise differences in the light emitted by the monitor when presenting the pictures  
259 influenced the light reflected by the participants' face and detected by the webcam. To  
260 address this confound, luminance for the pictures was regressed out of the individual trial  
261 timecourses. Luminance here was quantified by converting the pictures to CIE Lab 1976  
262 color space, and summarized as a single value for each picture by averaging across the L\*  
263 channel. For future research, we recommend matching the stimulus luminance across  
264 pictures if possible, making this regression step unnecessary. The presentation of the  
265 scrambled picture is critical, however, to prevent changes in screen luminance that  
266 correspond to the onset and offset of the picture-of-interest. We also recommend the

267 scrambled picture be presented in grayscale as color properties of the original pictures  
268 may not be matched across conditions (e.g., high arousing pictures were more red than  
269 neutral pictures).

270 For each trial and measure, the average heart rate in the 2000 ms prior to the  
271 picture onset was then subtracted from the entire trial period to align the picture onset  
272 across trials, i.e. a baseline correction. Then, for each HR recording type, separate  
273 averages are created for each subject in each of the emotional picture conditions. For  
274 statistical tests, the peak deceleration between 1500 and 3000 ms was used (based on  
275 prior findings; e.g., Abercrombie et al., 2008; Bradley et al., 2008; Buchanan et al.,  
276 2006), measured for each participant and emotion condition. See Figure 2 for a  
277 demonstration of the analysis pipeline for an event-related design.

278 **Data quality.** To ensure that the heart rate estimates obtained from the ECG and PulseOx  
279 data were sufficiently reliable, we excluded participants where the power at the peak  
280 frequency was less than twice the mean power in the sitting vs. standing task ( $N=1$ ).  
281 ANOVA results are reported with Greenhouse-Geisser correction for non-sphericity  
282 where appropriate.

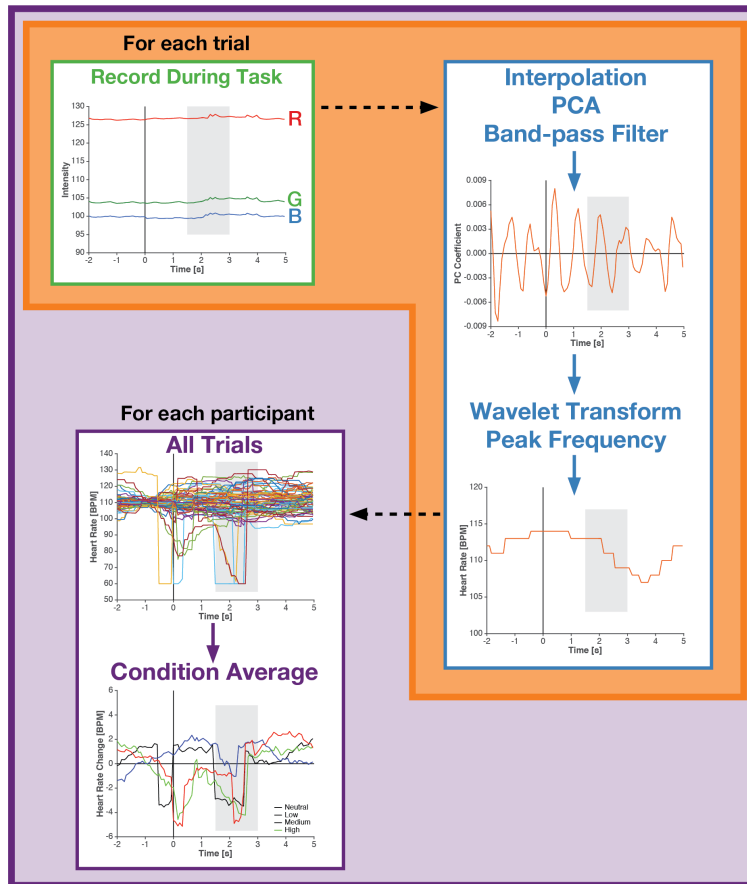

283

284 **Figure 2. Demonstration of the analysis pipeline for an event-related design.**

285

286

## Results

287 **Sitting vs. standing task**

288 We first compared heart rate measurements for sitting vs. standing with each  
289 measurement method using a 2 [*Posture*: Sit, Stand] × 3 [*Measure*: ECG, Pulse Oximetry  
290 (PulseOx), Webcam] repeated-measures ANOVA, averaging across block. As shown in  
291 Figure 3A, we observed a main effect of Posture [ $F(1,22)=85.29, p<0.001, \eta_p^2=0.80$ ],  
292 where standing was associated with a 10.4 BPM increase in heart rate relative to sitting.  
293 Neither the main effect of Measure [ $F(1,28)=2.29, p=0.14, \eta_p^2=0.09$ ] nor the interaction  
294 [ $F(2,42)=0.15, p=0.85, \eta_p^2=0.007$ ] were significant. Planned contrasts showed that the

295 effect of posture was observable using each measure individually [ECG:  $t(22)=8.92$ .  
296  $p<0.001$ , Cohen's  $d=0.82$ ,  $M_{diff} = 10.5$  BPM; PulseOx:  $t(22)=7.84$ ,  $p<0.001$ ,  $d=0.82$ ,  $M_{diff}$   
297 = 10.6 BPM; Webcam:  $t(22)=9.41$ ,  $p<0.001$ ,  $d=0.90$ ,  $M_{diff} = 10.2$  BPM].

298 To evaluate the agreement between the measurements more precisely, we  
299 additionally compared the heart-rate estimates from each block, i.e., 10 measurements per  
300 participant, between the three measures using correlations and Bland-Altman analyses.  
301 All three pairwise correlations were high and of similar magnitude [ECG–PulseOx:  
302  $r(458)=0.950$ ; ECG–Webcam:  $r(458)=0.913$ ; PulseOx–Webcam:  $r(458)=0.944$ ], as were  
303 the concordance correlation coefficients (Lin, 1989) [ECG–PulseOx:  $r(458)=0.949$ ;  
304 ECG–Webcam:  $r(458)=0.907$ ; PulseOx–Webcam:  $r(458)=0.935$ ]. In all three cases, 2 SD  
305 of the difference between the compared measurements was approximately 10 BPM, as  
306 shown in Figures 3B-D [ECG–PulseOx: 9.19 BPM; ECG–Webcam: 11.91 BPM;  
307 PulseOx–Webcam: 9.67 BPM]. We did, however, observe a greater degree of bias when  
308 using the webcam, relative to the other measurements [ECG–PulseOx:  $-0.56$  BPM; ECG–  
309 Webcam: 0.63 BPM; PulseOx–Webcam: 1.19 BPM]. This bias suggests that the webcam  
310 tends to slightly underestimate heart-rate estimates, perhaps due to the increased noise or  
311 slower sampling rate of the webcam measurement. Moreover, considering that certain  
312 participants are overrepresented in the outliers it is likely the case that some artifactual  
313 noise was impairing the ability to reliably determine the heart rate using some of the  
314 measures for these individuals. For instance, hair or clothes, as well as makeup, could  
315 interfere with the webcam measurement leading to unreliable estimates of HR on those  
316 blocks.

## Task-related heart rate estimates from a webcam 16

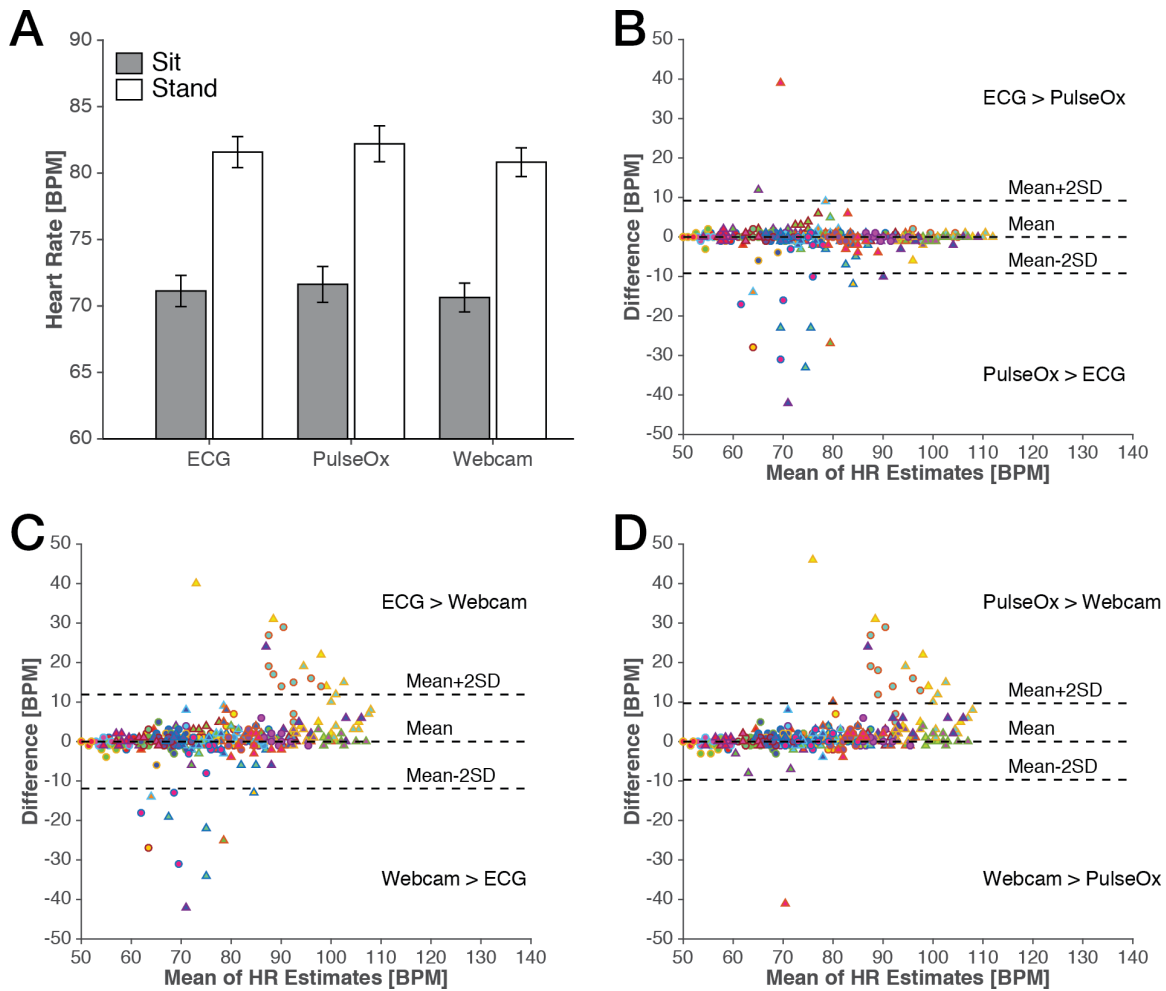

317

318 **Figure 3. Results from the sitting vs. standing task.** (A) Mean heart rate for sitting and  
319 standing from each measure. Error bars represent SEM, corrected for inter-individual  
320 differences (within-subject SEM; Loftus & Masson, 1999). Bland-Altman plots for pairs  
321 of measures: (B) ECG-PulseOx, (C) ECG-Webcam, and (D) PulseOx-Webcam. Markers  
322 represent each block of the task from each participant. Markers in distinct colors  
323 represent individual participants; measurements from sitting blocks are shown as circles,  
324 standing blocks are shown as triangles.  
325

### 326 Emotional and neutral picture-viewing task

327 As shown in Figure 4A-C the heart-rate decelerations for several of the conditions did not  
328 differ. Using the same stimuli in an fMRI study, Hrybouski et al. (2016) found that  
329 medium and high arousal stimuli were not distinct in behavioural ratings of emotional  
330 arousal or amygdala fMRI (BOLD) activity, and thus collapsed them together in their



331 reported analyses. Similarly, to maximally index the effect of the emotional pictures on  
332 heart rate, here we examined the mean response to the high and medium arousal picture  
333 conditions, compared to both the pre-stimulus baseline or viewing of the neutral pictures  
334 (Figure 3D). Thus, we pooled high and medium arousal images together and dropping the  
335 low arousal condition, as done in Hrybouski et al. (2016), as shown in Figure 4D-F.

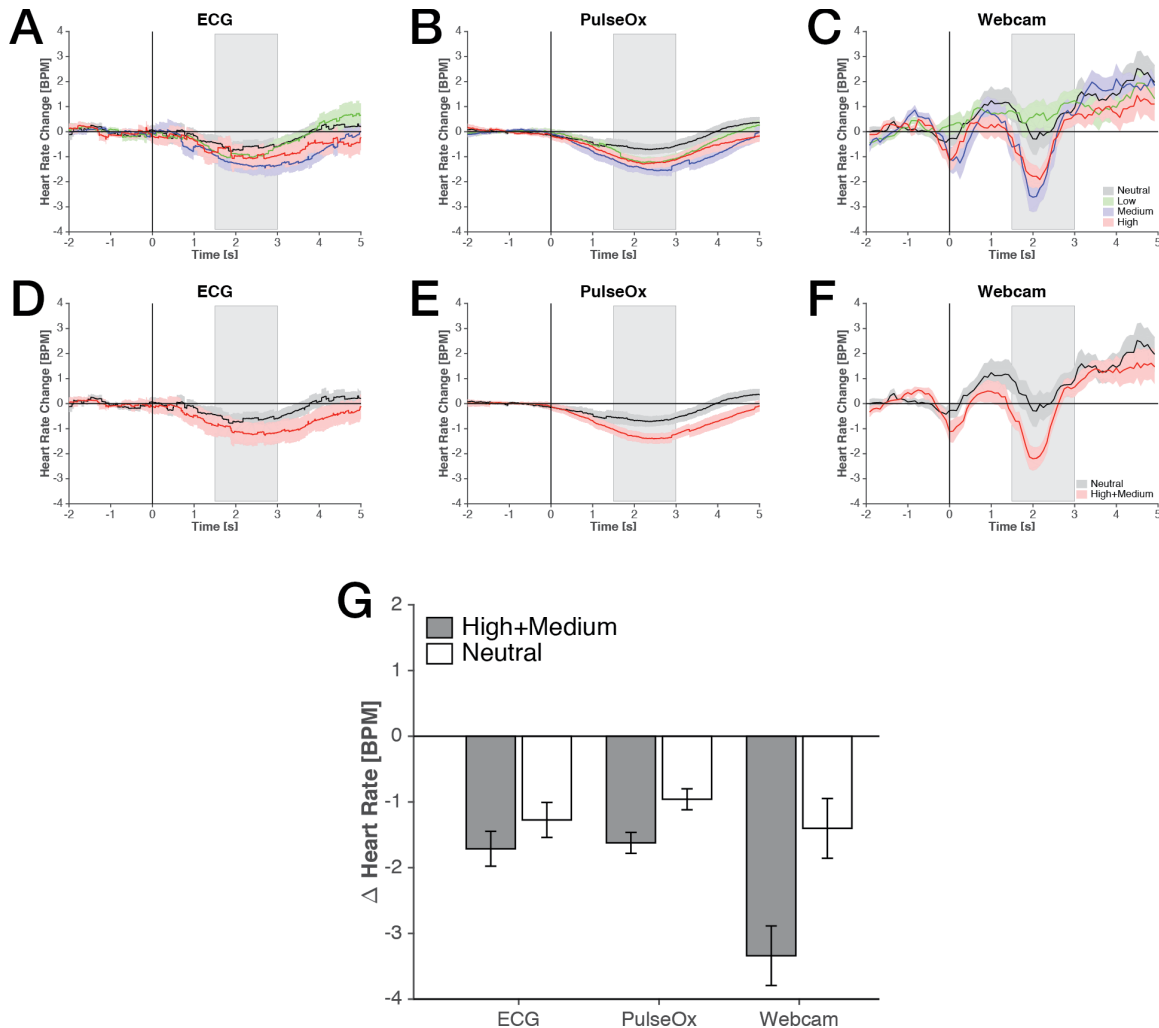

336  
337 **Figure 4. Results from the emotional and neutral picture-viewing task.** Event-related  
338 changes in heart rate in response to viewing each of the picture types, as measured by the  
339 (A) ECG, (B) PulseOx, and (C) Webcam. Shaded error bars represent within-subject  
340 SEM. The shaded time window (1500-3000 ms) depicts the data used in the statistical  
341 analyses. (D-F) Re-plots panels A-C, collapsing the High and Medium arousal conditions  
342 and removing the Low arousal condition. (G) Mean heart rate deceleration related to  
343 stimulus presentation, relative to the pre-stimulus baseline. Error bars represent SEM,  
344 corrected for inter-individual differences (within-subject SEM; Loftus & Masson, 1999).

345 We examine the heart-rate deceleration effects using a 2 [*Emotion*:  
346 High+Medium, Neutral]  $\times$  3 [*Measure*: ECG, Pulse Oximetry (PulseOx), Webcam]  
347 repeated-measures ANOVA, based on the mean heart rate during the analyzed window  
348 between 1500 and 3000 ms, relative to the pre-stimulus baseline (see Figure 4G). We  
349 observed a main effect of Emotion [ $F(1,22)=7.94, p=0.010, \eta_p^2=0.23$ ], where the  
350 High+Medium pictures were associated with a 1.01 BPM decrease in heart rate relative to  
351 Neutral pictures. Neither the main effect of Measure [ $F(1,23)=2.58, p=0.12, \eta_p^2=0.11$ ]  
352 nor the interaction [ $F(1,24)=1.56, p=0.22, \eta_p^2=0.068$ ] were significant.

353 Despite the non-significant interaction, as planned contrasts we nonetheless report  
354 the HR effects for each measure. With the ECG data we observed a significant heart-rate  
355 deceleration of 1.71 BPM relative to the pre-stimulus baseline [ $t(22)=4.40, p<0.001,$   
356  $d=0.96$ ], as well as a nominal deceleration of 0.44 BPM relative to viewing neutral  
357 pictures in the same window [ $t(22)=0.83, p=0.42, d=0.28$ ]. The pulse oximetry data  
358 presented similar effects of viewing the emotional stimuli [relative to baseline:  
359  $t(22)=4.81, p<0.001, d=1.04, 1.62$  BPM deceleration; relative to neutral pictures:  
360  $t(22)=2.08, p=0.049, d=0.52, 0.66$  BPM deceleration]. With the webcam we observed a  
361 significant heart-rate deceleration of 3.33 BPM relative to the pre-stimulus baseline  
362 [ $t(22)=4.37, p<0.001, d=0.95$ ], as well as a deceleration of 1.94 BPM relative to viewing  
363 neutral pictures in the same window [ $t(22)=2.14, p=0.044, d=0.57$ ]. Thus, we observed  
364 significant heart-rate decelerations for emotional pictures with the pulse oximetry and  
365 webcam measures, but not with ECG. While the ECG and pulse oximetry obtained  
366 similar decelerations due to the arousing pictures, the ECG measure had slightly more  
367 variance in the effect (see Figures 4D and E).

368 It is not clear why the webcam is yielding pronounced, and narrower, heart-rate  
369 deceleration effects, particularly since it has less temporal resolution than the other two  
370 measures. It is possible that the webcam is measuring autonomic changes in addition to  
371 those related to photoplethysmography, such as effects of temperature (influencing skin  
372 vasculature) or face-specific responses such as emotion-related changes in facial  
373 expressions or blushing. Vasoconstrictive or vasodilative changes associated with  
374 sympathetic activity may have also contributed. Future research is needed to better  
375 understand how these other factors can influence HR estimates obtained from face  
376 recordings. These additional factors may also be responsible for the slight acceleration  
377 detected just prior to the deceleration (i.e., the peak at approximately 0.75s in Figure 4F).

### 378 **Discussion**

379 Heart rate can change in relation to psychological processes, in addition to physiological  
380 states. Here we demonstrated that a standard webcam can readily be used as a heart rate  
381 measurement device. Despite limitations in sampling rate, we were able to measure small  
382 heart-rate decelerations commonly associated with processing emotional pictures, in  
383 addition to the much larger changes in heart rate that are known to be associated with  
384 physiological state changes.

385 Our results showed very close agreement with conventional techniques measured  
386 simultaneously in both blocked and event-related designs. Differences in the webcam in  
387 the block design could largely be attributed to two outlier subjects for whom the webcam  
388 reliably underestimated their heart rate (HR). Therefore some individuals seem to be  
389 better conceal from the camera their on-going HR. We cannot investigate in the current  
390 data set further to determine what characteristics physically or behaviourally were

391 associated with these imprecisions (e.g., we only saved the webcam data for the face  
392 AOI, not the full webcam frame; did not collect inter-individual difference measures), but  
393 future work should better understand such individual differences in the measurement  
394 success.

395         Measuring non-contact physiological changes in HR over long periods of time as  
396 we showed in our sit-stand results provides an important tool by which one could, in real  
397 time, or on recorded footage, identify the ongoing HR of individuals under various levels  
398 of physical activity, or in various situations. The live video itself can even be modified to  
399 accentuate or visualize the pulse and heart rate on the body (Poh et al., 2011a).

400         The work here was intended to serve as a proof-of-principle that measurement of  
401 HR via webcam is sensitive enough for psychological studies. HR decelerations have  
402 been shown to index subsequent memory (Abercrombie et al., 2008; Buchanan et al.,  
403 2006; Cunningham et al., 2014; Fiacconi et al., 2016; Garfinkel et al., 2013; Jennings &  
404 Hall, 1980), task difficulty (Kahneman et al., 1969), interoceptive awareness (Garfinkel et  
405 al., 2013), and state anxiety (Garfinkel et al., 2014; Schachter & Singer, 1962). Heart rate  
406 is also known to be coupled to other physiological measures such as pupil dilation, skin  
407 conductance, and microsaccades (Bradley et al., 2008; Kahneman et al., 1969; Ohl et al.,  
408 2016). Consideration is needed to determine the applicability of this webcam approach,  
409 however, as it may not be suitable sensor of heart rate in all cases. For instance, heart-rate  
410 variability (HRV) has been associated with physiological well-being, and is related to a  
411 variety of factors including autonomic regulation and reactivity to acute stressors (e.g.,  
412 Francis et al., 2015; Hallman et al., 2011; Shaffer et al., 2014). However, the current  
413 sampling rate of 12 Hz is insufficient, where HRV usually requires a sampling rate of 250

414 Hz or higher (Hejfel & Roth, 2004; Pizzuti et al., 1985; Schäfer & Vagedes, 2013).  
415 Higher-end webcams or other video cameras, i.e., high-speed cameras, may be able to  
416 acquire data at a suitable sampling rate for HRV analyses, though testing will be  
417 necessary to determine other limiting factors, such as the rate of MATLAB's video I/O  
418 protocol. Further research is also necessary to establish the boundary conditions or other  
419 hardware limitations associated with future applications of this webcam approach to  
420 measuring HR, such as an index of vasculature function.

421         From a technical standpoint, measuring heart rate using a webcam can afford  
422 several benefits relative to the standard approaches such as ECG and pulse oximetry.  
423 While these other measures are non-invasive, a webcam is additionally non-contact.  
424 Thus, a webcam can be used equally well with participants that may have sensitive or  
425 delicate skin, such as older adults or patient populations, where contact measurements  
426 may be problematic. Furthermore, the impedance of the connection between the ECG  
427 electrode and the skin may increase over time leading to increased noise in ECG HR  
428 estimates. Pulse oximetry can similarly become dislodged over time due to its placement  
429 on the finger, and is cumbersome and interferes with normal typing and movements.  
430 Webcam equipment is also much more available and affordable than ECG and pulse  
431 oximetry, potentially making heart rate analyses more cost effective for pilot studies or  
432 researchers with limited funding.

433         A webcam may also be used to covertly measure heart rate with the participant being  
434 unaware that this data is even being collected, as long as proper consent and IRB  
435 protocols are followed. For instance, covert heart-rate recording could be beneficial along  
436 with a Concealed Information Test (see Matsuda et al., 2012, for a review). In this case, it

437 is additionally useful to point out that the webcam need not be calibrated towards the  
438 participants' face, but merely needs to record video data from exposed skin, e.g., an arm,  
439 in the presence of sufficient ambient lighting. Others have previously demonstrated that a  
440 single webcam can be used to measure heart rate for several individuals simultaneously  
441 (Poh et al., 2010). Additionally, the use of webcams to measure heart rate could be  
442 beneficial to medical care, such as when using video communication in patient care (see  
443 Armfield et al., 2012). Although animals may seem like unlikely candidates for such  
444 measurement, the exposed skin on the face and ears of mammals can also provide a non-  
445 invasive window into single or multiple animal HR monitoring.

446       One could argue that the usefulness of this technique is limited by the requirement  
447 of the subject to be still in the camera focus. Others have circumvented by using face  
448 detection algorithms (Poh et al., 2010, 2011b) or could take advantage of signal filters  
449 designed for detecting skin pigments (Anderson & Parrish, 1981; Changizi et al., 2006;  
450 Edwards & Duntly, 1939; Tsumura et al., 1999, 2003). If desired, multiple cameras and  
451 3D motion trackers could be used to improve face/skin localization. Furthermore,  
452 movement artifacts are a similar problem for both ECG and PulseOx measurement. For  
453 experiment implementation, here we used the Psychophysics Toolbox and MATLAB.  
454 Functions within the Psychophysics Toolbox were used to present the stimuli while base  
455 MATLAB functions were used to interface with the webcam hardware. This allowed us  
456 to yolk webcam data recording to the stimulus presentation, but future studies could  
457 further integrate presentation and webcam recording for use with biofeedback (also see  
458 Lakens, 2013). In sum, here we demonstrated that the webcam is sufficiently sensitive for

459 psychologically relevant changes in heart rate, opening many potential lines of future  
460 research.

461

462

### **Acknowledgements**

463 This work was supported by a NSERC discovery grant and startup funds from the Faculty  
464 of Science to KEM. CRM was supported by a fellowship from the Canadian Institutes of  
465 Health Research (FRN-146793).

## References

- 466  
467 Abercrombie, H. C., Chambers, A. S., Greischar, L., & Monticelli, R. M. (2008). Orienting,  
468 emotion, and memory: Phasic and tonic variation in heart rate predicts memory for  
469 emotional pictures in men. *Neurobiology of Learning and Memory*, *90*, 644–650. doi:  
470 10.1016/j.nlm.2008.08.001
- 471 Ackles, P. K., Jennings, J. R., & Coles, M. G. H. (1985). *Advances in Psychophysiology* (Vol.  
472 1). Greenwich, CT: JAI.
- 473 Allen, J. (2007). Photoplethysmography and its application in clinical physiological measurement.  
474 *Physiological Measurement*, *28*, R1-R39.
- 475 Anderson, R. R., & Parrish, J. A. (1981). The optics of human skin. *Journal of Investigative*  
476 *Dermatology*, *77*, 13–19. doi:10.1111/1523-1747.ep12479191
- 477 Angelopoulou, E. (2001). Understanding the color of human skin. *SPIE Proceedings*, *4299*, 243.  
478 doi:10.1117/12.429495
- 479 Armfield, N. R., Gray, L. C., & Smith, A. C. (2012). Clinical use of Skype: a review of the evidence  
480 base. *Journal of Telemedicine and Telecare*, *18*, 125–127. doi:10.1258/jtt.2012.sft101
- 481 Bradley, M. M., Codispoti, M., Cuthbert, B. N., & Lang, P. J. (2001). Emotion and motivation I:  
482 Defensive and appetitive reactions in picture processing. *Emotion*, *1*, 276–298. doi:  
483 10.1037/1528-3542.1.3.276
- 484 Bradley, M. M., Codispoti, M., Sabatinelli, D., & Lang, P. J. (2001). Emotion and motivation II:  
485 Sex differences in picture processing. *Emotion*, *1*, 300–319. doi:10.1037/1528-3542.1.3.300
- 486 Bradley, M. M., Miccoli, L., Escrig, M. A., & Lang, P. J. (2008). The pupil as a measure of  
487 emotional arousal and autonomic activation. *Psychophysiology*, *45*, 602–607. doi:  
488 10.1111/j.1469-8986.2008.00654.x
- 489 Brainard, D. H. (1997). The psychophysics toolbox. *Spatial Vision*, *10*, 433–436. doi:  
490 10.1163/156856897x00357
- 491 Brunsting, L. A., & Sheard, C. (1929a). The color of the skin as analyzed by spectrophotometric  
492 methods: III. The rôle of superficial blood. *Journal of Clinical Investigation*, *7*, 593–613. doi:  
493 10.1172/jci100245
- 494 Brunsting, L. A., & Sheard, C. (1929b). The color of the skin as analyzed by spectrophotometric  
495 methods: II. The rôle of pigmentation. *Journal of Clinical Investigation*, *7*, 575–592. doi:  
496 10.1172/jci100244
- 497 Buchanan, T. W., Etzel, J. A., Adolphs, R., & Tranel, D. (2006). The influence of autonomic  
498 arousal and semantic relatedness on memory for emotional words. *International Journal of*  
499 *Psychophysiology*, *61*, 26–33. doi:10.1016/j.ijpsycho.2005.10.022
- 500 Campbell, B. A., Wood, G., & McBride, T. (1997). Origins of orienting and defensive responses:  
501 An evolutionary perspective. In P. J. Lang, R. F. Simons, & M. Balaban (Eds.), *Attention*  
502 *and orienting: Sensory and motivational processes* (pp. 41–67). New York: Lawrence  
503 Erlbaum.
- 504 Caro, C., Pedley, T., & Schroter, R. (1978). *The mechanics of the circulation*. Oxford: Oxford  
505 University Press.
- 506 Changizi, M. A., Zhang, Q., & Shimojo, S. (2006). Bare skin, blood and the evolution of primate  
507 colour vision. *Biology Letters*, *2*, 217–221. doi:10.1098/rsbl.2006.0440
- 508 Critchley, H. D., Eccles, J., & Garfinkel, S. N. (2013). Interaction between cognition, emotion, and  
509 the autonomic nervous system. *Handbook of Clinical Neurology*, *117*, 59–77. doi:  
510 10.1016/b978-0-444-53491-0.00006-7
- 511 Cunningham, T. J., Crowell, C. R., Alger, S. E., Kensinger, E. A., Villano, M. A., Mattingly, S. M., &  
512 Payne, J. D. (2004). Psychophysiological arousal at encoding leads to reduced reactivity but  
513 enhanced emotional memory following sleep. *Neurobiology of Learning and Memory*, *114*, 155-  
514 164. doi: 10.1016/j.nlm.2014.06.002
- 515 Damásio, A. (1994). *Descartes' error: Emotion, reason, and the human brain*. New York:  
516 Putnam.
- 517 Edwards, E. A., & Duntley, S. Q. (1939). The pigments and color of living human skin. *American*  
518 *Journal of Anatomy*, *65*, 1–33. doi:10.1002/aja.1000650102



- 519 Fiacconi, C. M., Peter, E. L., Owais, S., & Köhler, S. (2016). Knowing by heart: Visceral feedback  
520 shapes recognition memory judgments. *Journal of Experimental Psychology: General*, *145*,  
521 559–572. doi:10.1037/xge0000164
- 522 Francis, H. M., Penglis, K. M., & McDonald, S. (2015). Manipulation of heart rate variability can  
523 modify response to anger-inducing stimuli. *Social Neuroscience*, *11*, 545–552. doi:  
524 10.1080/17470919.2015.1115777
- 525 Garfinkel, S. N., Barrett, A. B., Minati, L., Dolan, R. J., Seth, A. K., & Critchley, H. D. (2013).  
526 What the heart forgets: Cardiac timing influences memory for words and is modulated by  
527 metacognition and interoceptive sensitivity. *Psychophysiology*, *50*, 505–512. doi:  
528 10.1111/psyp.12039
- 529 Garfinkel, S. N., & Critchley, H. D. (2016). Threat and the body: How the heart supports fear  
530 processing. *Trends in Cognitive Sciences*, *20*, 34–46. doi:10.1016/j.tics.2015.10.005
- 531 Garfinkel, S. N., Minati, L., Gray, M. A., Seth, A. K., Dolan, R. J., & Critchley, H. D. (2014).  
532 Fear from the heart: Sensitivity to fear stimuli depends on individual heartbeats. *Journal of*  
533 *Neuroscience*, *34*, 6573–6582. doi:10.1523/jneurosci.3507-13.2014
- 534 Graham, F. K., & Clifton, R. K. (1966). Heart-rate change as a component of the orienting  
535 response. *Psychological Bulletin*, *65*, 305–320. doi:10.1037/h0023258
- 536 Gribok, A. V., Chen, X., & Reifman, J. (2011). A robust method to estimate instantaneous heart rate  
537 from noisy electrocardiogram waveforms. *Annals of Biomedical Engineering*, *39*,  
538 824–834. doi:10.1007/s10439-010-0204-2
- 539 Guy, W. A. (1837). The effect produce upon the pulse by change of posture. *Guy's Hospital*  
540 *Reports*, *3*, 92–110.
- 541 Hallman, D. M., Olsson, E. M. G., von Schéele, B., Melin, L., & Lyskov, E. (2011). Effects of heart  
542 rate variability biofeedback in subjects with stress-related chronic neck pain: A pilot study.  
543 *Applied Psychophysiology and Biofeedback*, *36*, 71–80. doi:10.1007/s10484-011-9147-0
- 544 Hare, R. D. (1973). Orienting and defensive responses to visual stimuli. *Psychophysiology*, *10*,  
545 453–464.
- 546 Hejmel, L., & Roth, E. (2004). What is the adequate sampling interval of the ECG signal for heart rate  
547 variability analysis in the time domain? *Physiological Measurement*, *25*, 1405–1411.  
548 doi:10.1088/0967-3334/25/6/006
- 549 Herman, I. P. (2016). *Physics of the human body*. New York: Springer. doi:  
550 10.1007/978-3-319-23932-3
- 551 Horecker, B. L. (1943). The absorption spectra of hemoglobin and its derivatives in the visible and  
552 near infra-red regions. *Journal of Biological Chemistry*, *148*, 173–183.
- 553 Hrybouski, S., Aghamohammadi-Sereshki, A., Madan, C. R., Shafer, A. T., Baron, C. A., Seres,  
554 P., . . . Malykhin, N. V. (2016). Amygdala subnuclei response and connectivity during  
555 emotional processing. *NeuroImage*, *133*, 98–110. doi:10.1016/j.neuroimage.2016.02.056
- 556 Hughes, A. M., Whitten, T. A., Caplan, J. B., & Dickson, C. T. (2012). BOSC: A better  
557 oscillation detection method, extracts both sustained and transient rhythms from rat  
558 hippocampal recordings. *Hippocampus*, *22*, 1417–1428. doi:10.1002/hipo.20979
- 559 Jakovels, D., Kuzmina, I., Berzina, A., & Spigulis, J. (2012). RGB imaging system for monitoring of  
560 skin vascular malformation's laser therapy. *SPIE Proceedings*, *8427*, 37. doi:  
561 10.1117/12.922432
- 562 Jakovels, D., Spigulis, J., & Rogule, L. (2011). RGB mapping of hemoglobin distribution in skin.  
563 *SPIE Proceedings*, *8087*, 2B. doi:10.1117/12.889665
- 564 Jakovels, D., Spigulis, J., & Saknite, I. (2010). Multi-spectral mapping of in vivo skin hemoglobin  
565 and melanin. *SPIE Proceedings*, *7715*, 2Z. doi:10.1117/12.853928
- 566 Jennings, J. R., & Hall, S. W. (1980). Recall, recognition, and rate: Memory and the heart.  
567 *Psychophysiology*, *17*, 37–46. doi:10.1111/j.1469-8986.1980.tb02457.x
- 568 Jennings, J.R., Tahmoush, A.J., & Redmond, D.P. (1980). Non-invasive measurement of peripheral  
569 vascular activity. In I. Martin and P.H. Venables (Eds.), *Techniques in Psychophysiology* (pp.  
570 69-137). Wiley.

- 571 Kahneman, D., Tursky, B., Shapiro, D., & Crider, A. (1969). Pupillary, heart rate, and skin  
572 resistance changes during a mental task. *Journal of Experimental Psychology*, 79, 164–167.  
573 doi:10.1037/h0026952
- 574 Kim, D. H., & Kim, M.-J. (2006). Skin color analysis in HSV color space and rendering with fine  
575 scale skin structure. *Advances in Computer Graphics*, 254–264. doi:10.1007/11784203\_22
- 576 Krantz, D. S., & Falconer, J. J. (1997). Measurement of cardiovascular responses. In S. Cohen, R.  
577 C. Kessler, & L. U. Gordon (Eds.), *Measuring stress: A guide for health and social*  
578 *scientists* (pp. 193–212). New York: Oxford University Press.
- 579 Kwon, S., Kim, H., & Park, K. S. (2012). Validation of heart rate extraction using video imaging on  
580 a built-in camera system of a smartphone. *Proceedings of the Annual International Conference*  
581 *of the IEEE Engineering in Medicine and Biology Society, 2012*, 2174–2177. doi:  
582 10.1109/embc.2012.6346392
- 583 Lakens, D. (2013). Using a smartphone to measure heart rate changes during relived happiness and  
584 anger. *IEEE Transactions on Affective Computing*, 4, 238–241. doi:10.1109/t-affc.2013.3
- 585 Lang, P. J., Bradley, M. M., & Cuthbert, B. N. (2008). *International affective picture system*  
586 *(IAPS): Affective ratings of pictures and instruction manual* (Tech. Rep.). Gainesville, FL:  
587 University of Florida.
- 588 Lang, P. J., Greenwald, M. K., Bradley, M. M., & Hamm, A. O. (1993). Looking at pictures:  
589 Affective, facial, visceral, and behavioral reactions. *Psychophysiology*, 30, 261–273. doi:  
590 10.1111/j.1469-8986.1993.tb03352.x
- 591 Lee, J., Matsumura, K., Ichi Yamakoshi, K., Rolfe, P., Tanaka, S., & Yamakoshi, T. (2013).  
592 Comparison between red, green and blue light reflection photoplethysmography for heart rate  
593 monitoring during motion. *Proceedings of the IEEE Annual Conference on Engineering in*  
594 *Medicine and Biology Society (EMBC), 2013*, 1724–1727. doi:10.1109/embc.2013.6609852
- 595 Levenson, R. W. (2003). Autonomic specificity and emotion. In R. J. Davidson, K. R. Sherer, & H.  
596 H. Goldsmith (Eds.), *Handbook of affective sciences* (pp. 212–224). New York: Oxford  
597 University Press.
- 598 Lewandowska, M., Rumiński, J., Kocejko, T., & Nowak, J. (2011). Measuring pulse rate with a  
599 webcam—a non-contact method for evaluating cardiac activity. *Proceedings of the Federated*  
600 *Conference on Computer Science and Information Systems (FedCSIS), 2011*, 405–410.
- 601 Lin, L. I. (1989). A concordance correlation coefficient to evaluate reproducibility. *Biometrics*, 45, 255-  
602 268. doi: 10.2307/2532051
- 603 Loe, M. J., & Edwards, W. D. (2004a). A light-hearted look at a lion-hearted organ (or, a  
604 perspective from three standard deviations beyond the norm) part 1 (of 2 parts).  
605 *Cardiovascular Pathology*, 13, 282–292. doi:10.1016/j.carpath.2004.05.001
- 606 Loe, M. J., & Edwards, W. D. (2004b). A light-hearted look at a lion-hearted organ (or, a  
607 perspective from three standard deviations beyond the norm) part 2 (of 2 parts).  
608 *Cardiovascular Pathology*, 13, 334–340. doi:10.1016/j.carpath.2004.05.002
- 609 Lu, G., Yang, F., Taylor, J. A., & Stein, J. F. (2009). A comparison of  
610 photoplethysmography and ECG recording to analyse heart rate variability in healthy  
611 subjects. *Journal of Medical Engineering & Technology*, 33, 634–641. doi:  
612 10.3109/03091900903150998
- 613 MacWilliam, J. A. (1933). Postural effects on heart-rate and blood-pressure. *Quarterly Journal of*  
614 *Experimental Physiology*, 23, 1–33. doi:10.1113/expphysiol.1933.sp000588
- 615 Matsuda, I., Nittono, H., & Allen, J. J. B. (2012). The current and future status of the concealed  
616 information test for field use. *Frontiers in Psychology*, 3, 532. doi:10.3389/fpsyg.2012.00532
- 617 Ohl, S., Wohltat, C., Kliegl, R., Pollatos, O., & Engbert, R. (2016). Microsaccades are coupled to  
618 heartbeat. *Journal of Neuroscience*, 36, 1237–1241. doi:10.1523/jneurosci.2211-15.2016
- 619 Pizzuti, G., Cifaldi, S., & Nolfi, G. (1985). Digital sampling rate and ECG analysis. *Journal of*  
620 *Biomedical Engineering*, 7, 247–250. doi:10.1016/0141-5425(85)90027-5  
621 10.1145/2048259.2048261

- 622 Poh, M.-Z., McDuff, D. J., & Picard, R. W. (2010). Non-contact, automated cardiac pulse  
623 measurements using video imaging and blind source separation. *Optics Express*, *18*, 10762.  
624 doi:10.1364/oe.18.010762
- 625 Poh, M.-Z., McDuff, D. J., & Picard, R. W. (2011a). Advancements in noncontact,  
626 multiparameter physiological measurements using a webcam. *IEEE Transactions on*  
627 *Biomedical Engineering*, *58*, 7–11. doi:10.1109/tbme.2010.2086456
- 628 Poh, M.-Z., McDuff, D., & Picard, R. (2011b). A medical mirror for non-contact health  
629 monitoring. *ACM SIGGRAPH Emerging Technologies*, *2011*, 2. doi:  
630 Pursche, T., Krajewski, J., & Moeller, R. (2012). Video-based heart rate measurement from  
631 human faces. *IEEE International Conference on Consumer Electronics (ICCE)*, *2012*,  
632 548–549. doi:10.1109/icce.2012.6161965
- 633 Robinson, B. F., Epstein, S. E., Beiser, G. D., & Braunwald, E. (1966). Control of heart rate by the  
634 autonomic nervous system: Studies in man on the interrelation between baroreceptor  
635 mechanisms and exercise. *Circulation Research*, *19*, 400–411. doi:10.1161/01.res.19.2.400
- 636 Rushmer, R. F. (1976). *Cardiovascular dynamics* (4th ed.). Philadelphia: Saunders.
- 637 Schachter, S., & Singer, J. (1962). Cognitive, social, and physiological determinants of emotional  
638 state. *Psychological Review*, *69*, 379–399. doi:10.1037/h0046234
- 639 Schneider, E. C., & Truesdell, D. (1922). A statistical study of the pulse rate and the arterial  
640 blood pressures in recumbency, standing, and after a standard exercise. *American Journal*  
641 *of Physiology*, *61*, 429–474.
- 642 Schäfer, A., & Vagedes, J. (2013). How accurate is pulse rate variability as an estimate of heart  
643 rate variability? *International Journal of Cardiology*, *166*, 15–29. doi:  
644 10.1016/j.ijcard.2012.03.119
- 645 Shaffer, F., McCraty, R., & Zerr, C. L. (2014). A healthy heart is not a metronome: an integrative  
646 review of the heart's anatomy and heart rate variability. *Frontiers in Psychology*, *5*. doi:  
647 10.3389/fpsyg.2014.01040
- 648 Sheard, C., & Brown, G. E. (1926). The spectrophotometric analysis of the color of the skin.  
649 *Archives of Internal Medicine*, *38*, 816–831. doi:10.1001/archinte.1926.00120300133011
- 650 Sheard, C., & Brunsting, L. A. (1929). The color of the skin as analyzed by spectrophotometric  
651 methods: I. Apparatus and procedures. *Journal of Clinical Investigation*, *7*, 559–574. doi:  
652 10.1172/jci100243
- 653 Singhal, A., Shafer, A. T., Russell, M., Gibson, B., Wang, L., Vohra, S., & Dolcos, F. (2012).  
654 Electrophysiological correlates of fearful and sad distraction on target processing in  
655 adolescents with attention deficit-hyperactivity symptoms and affective disorders. *Frontiers*  
656 *in Integrative Neuroscience*, *6*, 119. doi:10.3389/fnint.2012.00119
- 657 Sokolov, E. N. (1963). Higher nervous functions: The orienting reflex. *Annual Review of*  
658 *Physiology*, *25*, 545–580. doi:10.1146/annurev.ph.25.030163.002553
- 659 Stein, E., Damato, A. N., Kosowsky, B. D., Lau, S. H., & Lister, J. W. (1966). The relation of heart  
660 rate to cardiovascular dynamics: Pacing by atrial electrodes. *Circulation*, *33*, 925–932.  
661 doi:10.1161/01.cir.33.6.925
- 662 Sun, Y., Papin, C., Azorin-Peris, V., Kalawsky, R., Greenwald, S., & Hu, S. (2011). Comparison of  
663 scientific CMOS camera and webcam for monitoring cardiac pulse after exercise. *SPIE*  
664 *Proceedings*, *8135*, 6. doi:10.1117/12.893362
- 665 Sun, Y., Papin, C., Azorin-Peris, V., Kalawsky, R., Greenwald, S., & Hu, S. (2012). Use of  
666 ambient light in remote photoplethysmographic systems: comparison between a  
667 high-performance camera and a low-cost webcam. *Journal of Biomedical Optics*, *17*, 037005.  
668 doi:10.1117/1.jbo.17.3.037005
- 669 Tsumura, N., Haneishi, H., & Miyake, Y. (1999). Independent-component analysis of skin color  
670 image. *Journal of the Optical Society of America A*, *16*, 2169–2176. doi:  
671 10.1364/josaa.16.002169
- 672 Tsumura, N., Haneishi, H., & Miyake, Y. (2000). Independent component analysis of spectral  
673 absorbance image in human skin. *Optical Review*, *7*, 479–482. doi:

- 674 10.1007/s10043-000-0479-x  
675 Tsumura, N., Ojima, N., Sato, K., Shiraishi, M., Shimizu, H., Nabeshima, H., . . . Miyake, Y. (2003).  
676 Image-based skin color and texture analysis/synthesis by extracting hemoglobin and melanin  
677 information in the skin. *ACM SIGGRAPH*, 22, 770–779. doi:  
678 10.1145/1201775.882344  
679 Verkruysse, W., Svaasand, L. O., & Nelson, J. S. (2008). Remote plethysmographic imaging using  
680 ambient light. *Optics Express*, 16, 21434–21445. doi:10.1364/oe.16.021434  
681 Wang, L., LaBar, K. S., Smoski, M., Rosenthal, M. Z., Dolcos, F., Lynch, T. R., . . . McCarthy, G.  
682 (2008). Prefrontal mechanisms for executive control over emotional distraction are altered in  
683 major depression. *Psychiatry Research: Neuroimaging*, 163, 143–155. doi:  
684 10.1016/j.psychresns.2007.10.004  
685 Wang, L., McCarthy, G., Song, A. W., & LaBar, K. S. (2005). Amygdala activation to sad  
686 pictures during high-field (4 Tesla) functional magnetic resonance imaging. *Emotion*, 5,  
687 12–22. doi:10.1037/1528-3542.5.1.12  
688 Whitten, T. A., Hughes, A. M., Dickson, C. T., & Caplan, J. B. (2011). A better oscillation  
689 detection method robustly extracts EEG rhythms across brain state changes: The human  
690 alpha rhythm as a test case. *NeuroImage*, 54, 860–874. doi:  
691 10.1016/j.neuroimage.2010.08.064
